# Supplementary material for: (20S) Ginsenoside Rh2-Activated, Distinct Apoptosis Pathways in Highly and Poorly Differentiated Human Esophageal Cancer Cells
Source: MDPI journal article supplement (doi:10.3390/molecules27175602), 2022-08-31
Supplement: s1 [file s1]

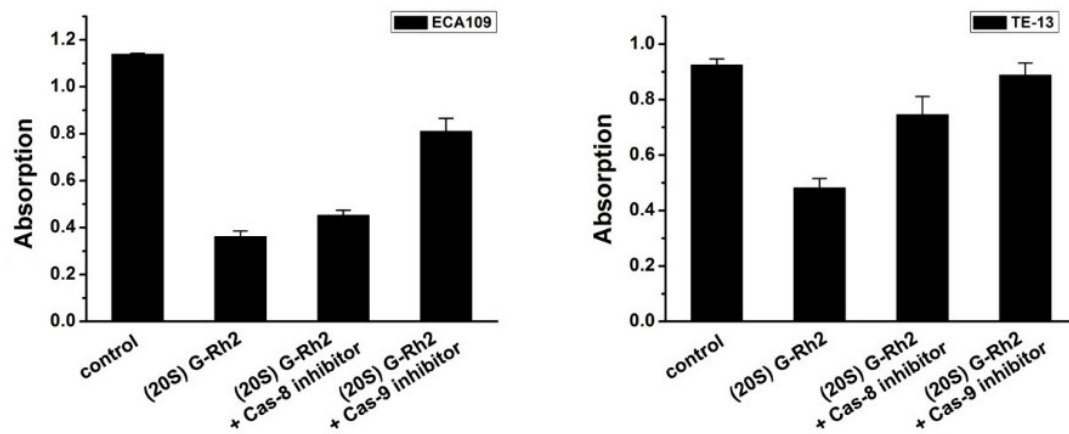

Figure S1. (20S)G-Rh2 induced caspase-dependent apoptosis in esophageal cancer cells identified by cell viability assay. ECA109 and TE-13 cells were co-treated with 5 $\mu$ g/mL (20S)G-Rh2 and 20 $\mu$ M inhibitor of caspase-8(Z-IEHD-FMK, MCE) or caspase-9 (Z-LETD-FMK, MCE) for 48 hours in a 96-wells plate. After treated with MTT, cells were solubilized with DMSO and measured at 550nm with an ELISA reader.

**Table S1.** Primers used in this study

| Gene    | Primers Sequences           |
|---------|-----------------------------|
| Bax_F   | TCAGGATGCGTCCACCAAGAAG      |
| Bax_R   | TGTGTCCACGGCGGCAATCATC      |
| Bak_F   | TTACCGCCATCAGCAGGAACAG      |
| Bak_R   | GGA ACTCTGAGTCATAGCGTCG     |
| Fas_F   | ATGCTGGGCATCTGGACCCTC       |
| Fas_R   | CTAGACCAAGCTTTGGATTTCATTCTG |
| DR5_F   | ATGGAACAACGGGGACAGAAGG      |
| DR5_R   | TTAGGACATGGCAGAGTCTGCATTAC  |
| GAPDH_F | ATGGGGAAGGTGAAGGTCGGAG      |
| GAPDH_R | TTACTCCTTGGAGGCCATGTGGGCC   |
