# Supplementary material for: (20S) Ginsenoside Rh2-Activated, Distinct Apoptosis Pathways in Highly and Poorly Differentiated Human Esophageal Cancer Cells
Source: Molecules. 2022 Aug 31;27(17):5602. doi: 10.3390/molecules27175602 (PMC9457866; doi:10.3390/molecules27175602)
Supplement: Supplementary file 1 [file molecules-27-05602-s001.zip › Table S2 & Table S3.xlsx]

## Sheet: Table S2. Fas
Table S2. List of up-regulated TFs which regulating Fas gene.
Gene	GeneName	control1_count	control2_count	control3_count	baseMean	SRh21_count	SRh22_count	SRh23_count	Log2FoldChange	pval	padj
ENSG00000120738	EGR1	29	26	26	2470	4679	5130	4133	-7.14943	0	0
ENSG00000162772	ATF3	213	168	221	3180.22	6228	5736	5499	-4.89045	2.73011e-270	2.00308e-266
ENSG00000177606	JUN	67	66	96	1008.42	1840	2078	1605	-4.55608	1.04315e-161	1.53072e-158
ENSG00000185022	MAFF	254	321	326	2109.81	3860	3877	3415	-3.66655	1.00467e-130	9.21407e-128
ENSG00000128016	ZFP36	63	92	106	406.299	683	786	606	-2.98168	5.13641e-56	1.67492e-53
ENSG00000122877	EGR2	0	1	1	8.94154	16	19	14	-2.04361	5.31884e-07	8.03797e-06
ENSG00000156273	BACH1	1396	852	1255	2927.32	4835	3643	4960	-2.03078	2.1325e-30	2.62961e-28
ENSG00000134107	BHLHE40	2538	2333	2760	6194.95	9923	9506	8901	-2.02804	5.30549e-66	2.16258e-63
ENSG00000205189	ZBTB10	133	74	103	243.144	405	292	402	-1.87114	1.57967e-18	1.10005e-16
ENSG00000153879	CEBPG	1376	954	1407	2757.1	4386	3801	4119	-1.84706	4.26947e-36	7.20117e-34
ENSG00000171940	ZNF217	795	574	928	1554.34	2433	2054	2285	-1.68671	8.69291e-27	9.37939e-25
ENSG00000173575	CHD2	1769	1375	1758	3282.62	5381	4434	4427	-1.67187	2.81974e-32	3.867e-30
ENSG00000198517	MAFK	699	902	801	1442.72	1919	2551	1593	-1.41861	2.14378e-15	1.13566e-13
ENSG00000172216	CEBPB	703	748	794	1273.22	1824	1651	1736	-1.35074	1.665e-22	1.43719e-20
ENSG00000130522	JUND	1081	1510	1160	2165.5	2805	3603	2536	-1.33462	1.69849e-13	7.24524e-12
ENSG00000095794	CREM	479	313	462	694.826	973	939	921	-1.31486	1.12025e-17	7.20986e-16
ENSG00000085274	MYNN	665	402	543	783.094	1053	792	1159	-1.03197	5.54671e-08	1.02898e-06
ENSG00000104856	RELB	134	196	125	228.82	290	367	234	-1.02798	4.31216e-06	5.21654e-05
ENSG00000096654	ZNF184	316	212	327	407.417	485	519	553	-1.00984	7.79983e-10	2.02934e-08
ENSG00000166478	ZNF143	478	368	488	632.742	834	745	825	-1.00185	1.0474e-11	3.55778e-10
ENSG00000169554	ZEB2	103	51	97	120.92	164	130	170	-0.986764	2.71916e-05	0.000263875
ENSG00000119138	KLF9	346	258	318	427.361	602	494	508	-0.943645	6.19612e-09	1.345e-07
ENSG00000120690	ELF1	717	496	822	920.984	1291	976	1154	-0.902024	1.9869e-07	3.28331e-06
ENSG00000186130	ZBTB6	432	341	401	527.377	628	529	784	-0.867111	1.12339e-06	1.57747e-05
ENSG00000136870	ZNF189	448	260	431	508.342	681	531	663	-0.866264	3.72044e-06	4.56286e-05
ENSG00000115966	ATF2	1577	1014	1454	1774.89	2228	1851	2397	-0.835482	4.78693e-07	7.33996e-06
ENSG00000180035	ZNF48	360	372	301	459.893	587	625	475	-0.831422	1.43611e-06	1.95486e-05
ENSG00000054267	ARID4B	1316	939	1234	1528.16	2108	1506	1943	-0.825601	8.38946e-07	1.20812e-05
ENSG00000005889	ZFX	1112	699	1132	1267.38	1617	1319	1648	-0.798294	3.08353e-06	3.88392e-05
ENSG00000172466	ZNF24	2227	1425	2367	2584.3	3270	2688	3376	-0.794253	2.55056e-06	3.27158e-05
ENSG00000137185	ZSCAN9	607	520	596	731.939	883	896	844	-0.764845	4.40302e-09	9.89433e-08
ENSG00000104064	GABPB1	1236	886	1224	1416.45	1740	1603	1729	-0.764699	5.81851e-08	1.07397e-06
ENSG00000066422	ZBTB11	1796	1308	1780	2059.15	2578	2024	2731	-0.747213	3.70098e-06	4.54461e-05
ENSG00000136997	MYC	11897	11276	13511	15415.3	18339	19597	17024	-0.745914	7.04909e-11	2.12836e-09
ENSG00000172845	SP3	2332	1533	2189	2529.63	3150	2605	3224	-0.731923	4.48087e-06	5.39839e-05
ENSG00000174720	LARP7	600	480	551	654.62	777	601	877	-0.62342	0.000340303	0.00239616
ENSG00000186446	ZNF501	35	18	25	32.371	40	26	48	-0.599186	0.0631014	0.159978
ENSG00000126804	ZBTB1	836	551	894	890.559	1068	859	1107	-0.580184	0.000818871	0.00501298
ENSG00000204859	ZBTB48	213	206	234	256.987	281	373	229	-0.573133	0.00186389	0.00994211
ENSG00000086589	RBM22	1757	1558	1847	1994.04	2335	2204	2189	-0.550621	5.97593e-06	6.97066e-05
ENSG00000083812	ZNF324	155	235	195	230.155	251	293	238	-0.542317	0.00680875	0.0289767
ENSG00000197024	ZNF398	581	523	648	672.01	804	741	713	-0.532036	0.000114078	0.000928955
ENSG00000140262	TCF12	1771	1188	1860	1832.6	2203	1937	2005	-0.524291	0.000597509	0.00384555
ENSG00000170325	PRDM10	438	330	474	473.233	613	482	490	-0.518303	0.00186236	0.00994119
ENSG00000121864	ZNF639	1470	888	1416	1430.96	1590	1491	1709	-0.516281	0.00163752	0.00894038

## Sheet: Table S3. DR5
Table S3. List of up-regulated TFs which regulating DR5 gene.
Gene	GeneName	control1_count	control2_count	control3_count	baseMean	SRh21_count	SRh22_count	SRh23_count	Log2FoldChange	pval	padj
ENSG00000162772	ATF3	213	168	221	3180.22	6228	5736	5499	-4.89045	2.73011e-270	2.00308e-266
ENSG00000123358	NR4A1	381	528	441	4388.81	7597	9416	6728	-4.09398	5.1152e-125	4.41532e-122
ENSG00000185022	MAFF	254	321	326	2109.81	3860	3877	3415	-3.66655	1.00467e-130	9.21407e-128
ENSG00000165030	NFIL3	423	311	462	1533.94	2780	2250	2582	-2.75327	1.69686e-69	7.32344e-67
ENSG00000122877	EGR2	0	1	1	8.94154	16	19	14	-2.04361	5.31884e-07	8.03797e-06
ENSG00000128272	ATF4	6759	5989	7292	16331	24483	26971	23444	-2.04142	4.38116e-75	2.07384e-72
ENSG00000156273	BACH1	1396	852	1255	2927.32	4835	3643	4960	-2.03078	2.1325e-30	2.62961e-28
ENSG00000134107	BHLHE40	2538	2333	2760	6194.95	9923	9506	8901	-2.02804	5.30549e-66	2.16258e-63
ENSG00000067082	KLF6	184	126	189	388.137	610	581	568	-1.92189	5.04597e-32	6.73133e-30
ENSG00000205189	ZBTB10	133	74	103	243.144	405	292	402	-1.87114	1.57967e-18	1.10005e-16
ENSG00000153879	CEBPG	1376	954	1407	2757.1	4386	3801	4119	-1.84706	4.26947e-36	7.20117e-34
ENSG00000102554	KLF5	1900	1501	2336	4064.73	6867	5001	6040	-1.75915	2.42169e-26	2.55653e-24
ENSG00000116044	NFE2L2	3981	2885	3934	6762.38	9816	8407	10478	-1.54671	1.65689e-25	1.68842e-23
ENSG00000198517	MAFK	699	902	801	1442.72	1919	2551	1593	-1.41861	2.14378e-15	1.13566e-13
ENSG00000144802	NFKBIZ	264	163	204	370.211	564	462	511	-1.3953	1.78222e-14	8.51865e-13
ENSG00000172216	CEBPB	703	748	794	1273.22	1824	1651	1736	-1.35074	1.665e-22	1.43719e-20
ENSG00000132170	PPARG	99	70	99	153.004	218	214	199	-1.33706	2.99289e-12	1.08977e-10
ENSG00000130522	JUND	1081	1510	1160	2165.5	2805	3603	2536	-1.33462	1.69849e-13	7.24524e-12
ENSG00000095794	CREM	479	313	462	694.826	973	939	921	-1.31486	1.12025e-17	7.20986e-16
ENSG00000122482	ZNF644	1522	1166	1358	2243.39	2955	2448	3684	-1.29317	4.23347e-14	1.94739e-12
ENSG00000148516	ZEB1	519	378	473	749.865	1017	854	1156	-1.27451	2.30537e-14	1.08775e-12
ENSG00000146587	RBAK	918	608	789	1251.04	1746	1400	1880	-1.2506	1.8968e-13	7.99578e-12
ENSG00000153922	CHD1	1774	1198	1573	2285.69	3184	2338	3375	-1.10648	2.73614e-10	7.69159e-09
ENSG00000197961	ZNF121	540	289	481	654.981	954	757	845	-1.09695	5.29757e-09	1.17427e-07
ENSG00000136603	SKIL	887	514	798	1087.14	1557	1128	1524	-1.07218	1.04732e-08	2.2081e-07
ENSG00000172059	KLF11	905	746	943	1247.77	1757	1555	1463	-1.0334	4.53153e-14	2.07152e-12
ENSG00000085274	MYNN	665	402	543	783.094	1053	792	1159	-1.03197	5.54671e-08	1.02898e-06
ENSG00000155090	KLF10	1090	885	1306	1571.25	2142	1754	2100	-1.02322	2.66796e-11	8.69992e-10
ENSG00000181472	ZBTB2	458	328	515	622.631	841	730	809	-1.0213	2.00173e-10	5.75949e-09
ENSG00000166478	ZNF143	478	368	488	632.742	834	745	825	-1.00185	1.0474e-11	3.55778e-10
ENSG00000095574	IKZF5	596	405	584	750.228	1023	840	985	-0.995125	8.10145e-10	2.09666e-08
ENSG00000169554	ZEB2	103	51	97	120.92	164	130	170	-0.986764	2.71916e-05	0.000263875
ENSG00000123268	ATF1	2334	1665	2332	2948.37	3927	3157	4006	-0.963678	6.34433e-10	1.67139e-08
ENSG00000175832	ETV4	57	65	71	92.2464	86	144	123	-0.94556	6.12009e-05	0.000537762
ENSG00000119138	KLF9	346	258	318	427.361	602	494	508	-0.943645	6.19612e-09	1.345e-07
ENSG00000120690	ELF1	717	496	822	920.984	1291	976	1154	-0.902024	1.9869e-07	3.28331e-06
ENSG00000155545	MIER3	620	379	547	699.04	838	737	1017	-0.890926	9.29803e-07	1.32723e-05
ENSG00000136870	ZNF189	448	260	431	508.342	681	531	663	-0.866264	3.72044e-06	4.56286e-05
ENSG00000075426	FOSL2	4029	4129	4620	5636.43	7273	7061	6278	-0.845045	1.84951e-11	6.15413e-10
ENSG00000115966	ATF2	1577	1014	1454	1774.89	2228	1851	2397	-0.835482	4.78693e-07	7.33996e-06
ENSG00000180035	ZNF48	360	372	301	459.893	587	625	475	-0.831422	1.43611e-06	1.95486e-05
ENSG00000054267	ARID4B	1316	939	1234	1528.16	2108	1506	1943	-0.825601	8.38946e-07	1.20812e-05
ENSG00000005889	ZFX	1112	699	1132	1267.38	1617	1319	1648	-0.798294	3.08353e-06	3.88392e-05
ENSG00000172466	ZNF24	2227	1425	2367	2584.3	3270	2688	3376	-0.794253	2.55056e-06	3.27158e-05
ENSG00000144161	ZC3H8	524	399	593	646.849	723	774	834	-0.780749	1.99612e-07	3.29113e-06
ENSG00000118260	CREB1	536	291	512	572.694	712	550	801	-0.771953	0.00013166	0.00105484
ENSG00000167635	ZNF146	2755	2091	2647	3185.24	3748	3338	4313	-0.766416	2.6384e-07	4.24517e-06
ENSG00000137185	ZSCAN9	607	520	596	731.939	883	896	844	-0.764845	4.40302e-09	9.89433e-08
ENSG00000104064	GABPB1	1236	886	1224	1416.45	1740	1603	1729	-0.764699	5.81851e-08	1.07397e-06
ENSG00000066422	ZBTB11	1796	1308	1780	2059.15	2578	2024	2731	-0.747213	3.70098e-06	4.54461e-05
ENSG00000136997	MYC	11897	11276	13511	15415.3	18339	19597	17024	-0.745914	7.04909e-11	2.12836e-09
ENSG00000172845	SP3	2332	1533	2189	2529.63	3150	2605	3224	-0.731923	4.48087e-06	5.39839e-05
ENSG00000168795	ZBTB5	1024	887	1032	1190.99	1547	1264	1324	-0.65252	4.36091e-06	5.26684e-05
ENSG00000162419	GMEB1	392	349	466	478.421	557	626	468	-0.608323	7.29533e-05	0.000627133
ENSG00000120798	NR2C1	1052	617	910	1018.89	1151	1048	1300	-0.604323	0.000482929	0.00324028
ENSG00000186446	ZNF501	35	18	25	32.371	40	26	48	-0.599186	0.0631014	0.159978
ENSG00000136866	ZFP37	105	114	108	131.303	134	128	189	-0.590766	0.00709574	0.029886
ENSG00000126804	ZBTB1	836	551	894	890.559	1068	859	1107	-0.580184	0.000818871	0.00501298
ENSG00000064703	DDX20	1277	989	1509	1468.23	1621	1705	1677	-0.577393	3.17558e-05	0.000303759
ENSG00000115548	KDM3A	1422	1074	1469	1541.86	1731	1782	1732	-0.574242	8.57797e-06	9.60131e-05
ENSG00000204859	ZBTB48	213	206	234	256.987	281	373	229	-0.573133	0.00186389	0.00994211
ENSG00000074266	EED	1152	865	1236	1251.98	1423	1362	1442	-0.549883	7.02036e-05	0.000605269
ENSG00000164749	HNF4G	5	8	13	11.3234	17	10	14	-0.542613	0.16621	0.322444
ENSG00000083812	ZNF324	155	235	195	230.155	251	293	238	-0.542317	0.00680875	0.0289767
ENSG00000178913	TAF7	3469	2514	3615	3671.5	4013	4142	4204	-0.538217	4.67739e-05	0.000424862
ENSG00000170325	PRDM10	438	330	474	473.233	613	482	490	-0.518303	0.00186236	0.00994119
ENSG00000121864	ZNF639	1470	888	1416	1430.96	1590	1491	1709	-0.516281	0.00163752	0.00894038
ENSG00000171469	ZNF561	554	319	594	552.919	628	595	626	-0.504356	0.00516538	0.0232648
